# Supplementary material for: Investigating the behavior of various cocatalysts on LaTaON2 photoanode for visible light water splitting
Source: Royal Society of Chemistry journal article supplement (doi:10.1039/c6cp07253d), 2016-11-30
Supplement: c6cp07253d1.pdf [file c6cp07253d1.pdf]

## Supporting Information

### Investigating the behavior of various cocatalysts on LaTaON<sub>2</sub> photoanode for visible light water splitting

Wenping Si,<sup>a</sup> Daniele Pergolesi,<sup>a</sup> Fatima Haydous,<sup>a</sup> Aline Fluri,<sup>a</sup> Alexander Wokaun<sup>a</sup> and Thomas Lippert<sup>a,b\*</sup>

<sup>a</sup> Thin Films and Interfaces, Research with Neutrons and Muons Department, Paul Scherrer Institut, 5232 Villigen PSI, Switzerland

<sup>b</sup> Laboratory of Inorganic Chemistry, Department of Chemistry and Applied Biosciences, ETH Zurich, 8093 Zurich, Switzerland

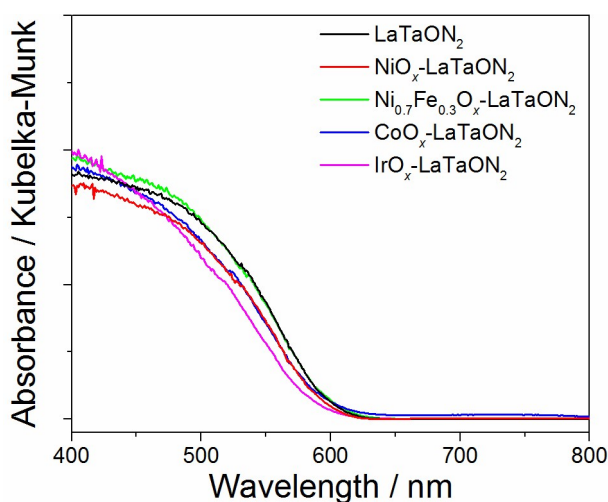

**Fig. S1** Kubelka-Munk absorbance for LaTaON<sub>2</sub>, NiO<sub>x</sub>-LaTaON<sub>2</sub>, Ni<sub>0.7</sub>Fe<sub>0.3</sub>O<sub>x</sub>-LaTaON<sub>2</sub>, and CoO<sub>x</sub>-LaTaON<sub>2</sub> as well as post-loaded IrO<sub>x</sub>-LaTaON<sub>2</sub>.

In comparison with the bare LaTaON<sub>2</sub>, only slight changes occur in the absorbance at 405 nm (light source for PEC measurement) for the cocatalysts loaded LaTaON<sub>2</sub>. This is understandable if considering quite low nominal loading amount (2 wt%) of these cocatalysts. In addition, the absorption edge is also slightly blue shifted after loading cocatalysts, which could be due to the shading effect of cocatalysts.

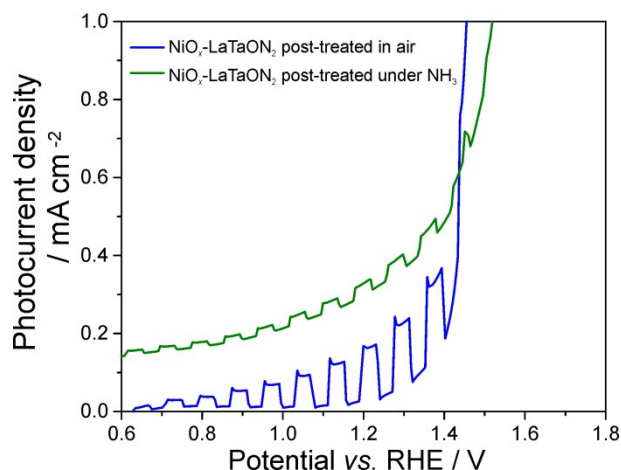

**Fig. S2** Potentiodynamic measurements in 0.5 M NaOH (pH=13.0) for  $\text{NiO}_x\text{-LaTaON}_2$  after treatment in air and under  $\text{NH}_3$ .

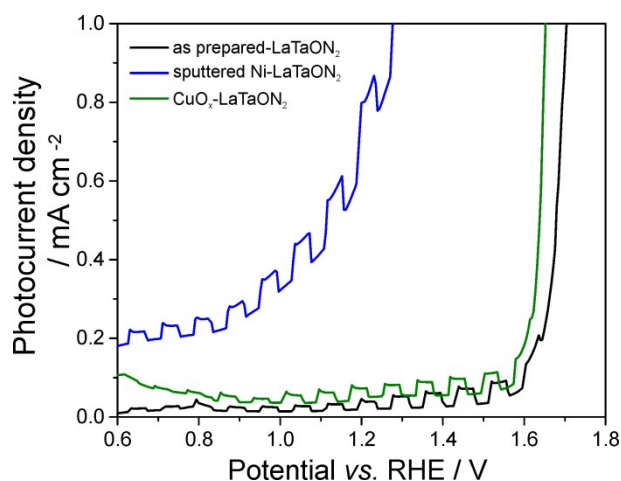

**Fig. S3** Potentiodynamic measurements in 0.5 M NaOH (pH=13.0) for sputtered  $\text{Ni-LaN}_2$  and  $\text{CuO}_x\text{-LaTaON}_2$  in comparison to as prepared- $\text{LaTaON}_2$ .

### **$\text{H}_2\text{O}_2$ as hole scavenger**

$\text{H}_2\text{O}_2/\text{O}_2$  has a relatively negative oxidation potential ( $0.682 \text{ V}_{\text{RHE}}$ ) and its rate constant is 10 to 100 times higher than that of water.<sup>1</sup> Thus,  $\text{H}_2\text{O}_2$  is an efficient hole scavenger in electrolyte to suppress surface recombinations. Holes that come to the surface will be immediately captured and participate in the oxidation of  $\text{H}_2\text{O}_2$ . Assuming that all samples have the same bulk recombination, any difference seen in the photocurrent of  $\text{H}_2\text{O}_2$  oxidation should therefore be due to the recombination at the interfaces between  $\text{LaTaON}_2$  and the cocatalysts as well as the electrolyte.

As shown in Fig. S3, the photocurrent of  $\text{NiO}_x\text{-LaTaON}_2$  is the highest followed by that of  $\text{Ni}_{0.7}\text{Fe}_{0.3}\text{O}_x\text{-LaTaON}_2$ , both higher than that of bare  $\text{LaTaON}_2$ . The improvement in the photocurrent indicates a reduced recombination and good passivation at the interface of  $\text{LaTaON}_2$  and the cocatalysts, which is consistent with our conclusions.

$\text{CoO}_x$ - and  $\text{IrO}_x$ -loaded  $\text{LaTaON}_2$  exhibit huge background cathodic and anodic currents, which makes the chopped photocurrent characteristics undetectable. This is probably due to their high catalytic activity for  $\text{H}_2\text{O}_2$  oxidation and the photocurrent-doubling phenomena, which causes the oxidized form of  $\text{H}_2\text{O}_2$  to be oxidized again through injection of an electron into the conduction band of the semiconductor.<sup>1-4</sup> The oxidation procedures can be described as follows:  $\text{H}_2\text{O}_2 + \text{h}^+ \rightarrow 2\text{H}^+ + \text{O}_2^-$  and  $\text{O}_2^- \rightarrow \text{O}_2 + \text{e}^-$ .<sup>4</sup> In comparison to  $\text{NiO}_x$ - and  $\text{Ni}_{0.7}\text{Fe}_{0.3}\text{O}_x\text{-LaTaON}_2$ ,  $\text{CoO}_x$ - and  $\text{IrO}_x$ -loaded  $\text{LaTaON}_2$  have higher background currents, which is also consistent with the PEC measurement without  $\text{H}_2\text{O}_2$ , indicating the more dependency of the system's photocurrent on the catalytic effect of  $\text{CoO}_x$  and  $\text{IrO}_x$ .

However, the presence of a hole scavenger and cocatalyst still did not significantly enhance the photocurrent up to the  $\text{mA cm}^{-2}$  range, implying that the PEC performance is not limited by surface or interface recombination, but rather by the recombination or low electronic conductivity in the bulk of  $\text{LaTaON}_2$ .

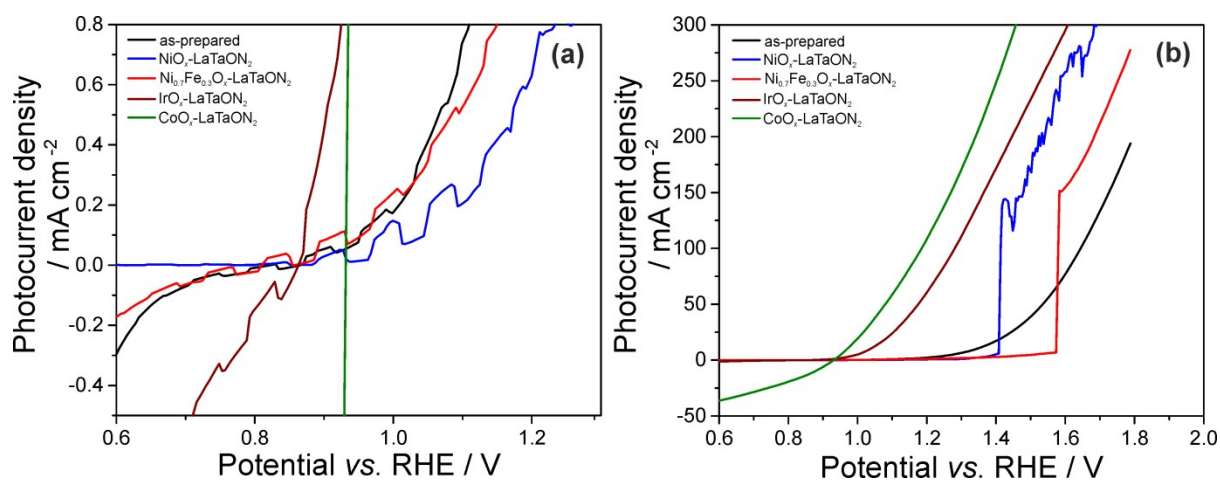

**Fig. S4** PEC performance under chopped light in 0.5 M NaOH with the presence of 0.1 M  $\text{H}_2\text{O}_2$  for pre-loaded  $\text{NiO}_x\text{-LaTaON}_2$ ,  $\text{Ni}_{0.7}\text{Fe}_{0.3}\text{O}_x\text{-LaTaON}_2$ , and  $\text{CoO}_x\text{-LaTaON}_2$  as well as post-loaded  $\text{IrO}_x\text{-LaTaON}_2$ . (a). Zoomed-in view of PEC performance. (b). PEC performance between 0.6–1.8  $V_{\text{RHE}}$ , calculated based on the illuminated area of 3  $\text{mm}^2$ .

## References

1. H. Dotan, K. Sivula, M. Gratzel, A. Rothschild and S. C. Warren, *Energy Environ. Sci.*, 2011, **4**, 958–964.
2. B. P. Minks, G. Oskam, D. Vanmaekelbergh and J. J. Kelly, *J. Electroanal. Chem. Interfacial Electrochem.*, 1989, **273**, 119–131.
3. A. Theuwis, I. E. Vermeir and W. P. Gomes, *J. Electroanal. Chem.*, 1996, **410**, 31–42.
4. F. F. Abdi and R. van de Krol, *J. Phys. Chem. C*, 2012, **116**, 9398–9404.
5. M. Higashi, Y. Yamanaka, O. Tomita and R. Abe, *APL Materials*, 2015, **3**, 104418.
